# Supplementary material for: Post-Harvest Treatment with Methyl Jasmonate Impacts Lipid Metabolism in Tomato Pericarp (Solanum lycopersicum L. cv. Grape) at Different Ripening Stages
Source: MDPI journal article supplement (doi:10.3390/foods10040877), 2021-04-16
Supplement: s1 [file s1]

**Table S1.** Carotenoids contents ( $\mu\text{g}\cdot\text{g}^{-1}$  FW) in tomato pericarp (*Solanum lycopersicum* L. cv. Grape) exposed to 1-methylcyclopropene (MCP) and both 1-methylcyclopropene and methyl jasmonate (MCP+ MeJA) treatments at 04, 10 and 21 days after harvest (DAH) detected by high performance liquid chromatography (HPLC).

| Metabolite        | 04 DAH                       |                              |                              | 10 DAH                        |                               |                              | 21 DAH                        |                               |                               |
|-------------------|------------------------------|------------------------------|------------------------------|-------------------------------|-------------------------------|------------------------------|-------------------------------|-------------------------------|-------------------------------|
|                   | CTRL                         | MCP                          | MCP + MeJA                   | CTRL                          | MCP                           | MeJA + MCP                   | CTRL                          | MCP                           | MCP + MeJA                    |
| Lycopene          | 15.4 $\pm$ 0.43 <sup>g</sup> | 0.52 $\pm$ 0.01 <sup>h</sup> | 0.63 $\pm$ 0.01 <sup>h</sup> | 487.1 $\pm$ 4.10 <sup>c</sup> | 61.1 $\pm$ 0.59 <sup>f</sup>  | 81.9 $\pm$ 0.19 <sup>e</sup> | 653.6 $\pm$ 0.82 <sup>b</sup> | 234.8 $\pm$ 0.66 <sup>d</sup> | 712.5 $\pm$ 0.35 <sup>a</sup> |
| $\beta$ -carotene | 3.87 $\pm$ 0.02 <sup>d</sup> | 2.57 $\pm$ 0.02 <sup>g</sup> | 2.72 $\pm$ 0.01 <sup>f</sup> | 5.32 $\pm$ 0.10 <sup>c</sup>  | 2.68 $\pm$ 0.07 <sup>fg</sup> | 2.97 $\pm$ 0.02 <sup>e</sup> | 7.23 $\pm$ 0.01 <sup>b</sup>  | 3.02 $\pm$ 0.01 <sup>c</sup>  | 8.02 $\pm$ 0.01 <sup>a</sup>  |
| Lutein            | 2.43 $\pm$ 0.02 <sup>g</sup> | 2.07 $\pm$ 0.01 <sup>i</sup> | 2.31 $\pm$ 0.01 <sup>h</sup> | 3.27 $\pm$ 0.06 <sup>c</sup>  | 2.56 $\pm$ 0.04 <sup>f</sup>  | 2.88 $\pm$ 0.03 <sup>d</sup> | 3.93 $\pm$ 0.05 <sup>b</sup>  | 2.75 $\pm$ 0.04 <sup>e</sup>  | 4.67 $\pm$ 0.03 <sup>a</sup>  |
| Total             | 21.7 $\pm$ 0.42 <sup>g</sup> | 5.17 $\pm$ 0.01 <sup>h</sup> | 5.66 $\pm$ 0.03 <sup>h</sup> | 495.6 $\pm$ 4.10 <sup>c</sup> | 66.3 $\pm$ 0.63 <sup>f</sup>  | 87.8 $\pm$ 0.22 <sup>e</sup> | 664.7 $\pm$ 0.85 <sup>b</sup> | 240.8 $\pm$ 0.68 <sup>d</sup> | 725.1 $\pm$ 0.35 <sup>a</sup> |

CTRL: Control fruits. Different superscript letters (a-h) indicate statistical significance ( $P < 0.05$ ) at the same line (mean  $\pm$  standard deviation.  $n = 4$ ).

**Table S2.** Tocopherols, phytol and phytosterols in tomato pericarp (*Solanum lycopersicum* L. cv. Grape) exposed to 1-methylcyclopropene (MCP) and both 1-methylcyclopropene and methyl jasmonate (MCP+ MeJA) treatments at 04, 10 and 21 days after harvest (DAH) detected by gas chromatography-mass spectrometry (GC-MS).

| Metabolite              | 04 DAH                         |                              |                              | 10 DAH                        |                               |                               | 21 DAH                        |                               |                                |
|-------------------------|--------------------------------|------------------------------|------------------------------|-------------------------------|-------------------------------|-------------------------------|-------------------------------|-------------------------------|--------------------------------|
|                         | CTRL                           | MCP                          | MCP + MeJA                   | CTRL                          | MCP                           | MCP + MeJA                    | CTRL                          | MCP                           | MCP + MeJA                     |
| A) Tocopherols          |                                |                              |                              |                               |                               |                               |                               |                               |                                |
| $\alpha$ -tocopherol    | 152,7 $\pm$ 14,5 <sup>d</sup>  | 32,1 $\pm$ 1,41 <sup>e</sup> | 37,1 $\pm$ 6,01 <sup>e</sup> | 531,9 $\pm$ 12,1 <sup>a</sup> | 42,7 $\pm$ 4,84 <sup>e</sup>  | 193,4 $\pm$ 9,80 <sup>c</sup> | 375,8 $\pm$ 1,57 <sup>b</sup> | 137,2 $\pm$ 1,41 <sup>d</sup> | 535,8 $\pm$ 40,2 <sup>a</sup>  |
| $\beta$ -tocopherol     | 14,1 $\pm$ 0,27 <sup>d</sup>   | 0,98 $\pm$ 0,13 <sup>g</sup> | 1,15 $\pm$ 0,18 <sup>g</sup> | 62,3 $\pm$ 2,15 <sup>a</sup>  | 2,66 $\pm$ 0,12 <sup>g</sup>  | 6,85 $\pm$ 0,10 <sup>e</sup>  | 31,6 $\pm$ 0,23 <sup>c</sup>  | 4,70 $\pm$ 0,02 <sup>f</sup>  | 44,8 $\pm$ 0,03 <sup>b</sup>   |
| $\gamma$ -tocopherol    | 11,6 $\pm$ 0,49 <sup>d</sup>   | 1,91 $\pm$ 0,15 <sup>g</sup> | 2,03 $\pm$ 0,05 <sup>g</sup> | 14,6 $\pm$ 0,38 <sup>c</sup>  | 2,71 $\pm$ 0,09 <sup>g</sup>  | 8,71 $\pm$ 0,16 <sup>e</sup>  | 18,9 $\pm$ 0,72 <sup>b</sup>  | 3,71 $\pm$ 0,12 <sup>f</sup>  | 22,7 $\pm$ 0,79 <sup>a</sup>   |
| Total                   | 178,4 $\pm$ 15,1 <sup>cd</sup> | 34,9 $\pm$ 0,86 <sup>e</sup> | 40,3 $\pm$ 0,99 <sup>e</sup> | 608,9 $\pm$ 14,6 <sup>a</sup> | 48,11 $\pm$ 4,77 <sup>e</sup> | 208,9 $\pm$ 6,07 <sup>c</sup> | 426,4 $\pm$ 1,45 <sup>b</sup> | 145,6 $\pm$ 1,67 <sup>e</sup> | 603,2 $\pm$ 39,8 <sup>a</sup>  |
| B) Acyclic diterpenoids |                                |                              |                              |                               |                               |                               |                               |                               |                                |
| Phytol                  | 21,3 $\pm$ 2,25 <sup>a</sup>   | 10,9 $\pm$ 0,21 <sup>b</sup> | 19,5 $\pm$ 1,05 <sup>a</sup> | 9,54 $\pm$ 0,18 <sup>bc</sup> | 9,80 $\pm$ 0,59 <sup>b</sup>  | 19,9 $\pm$ 0,18 <sup>a</sup>  | 6,75 $\pm$ 0,04 <sup>d</sup>  | 7,19 $\pm$ 0,14 <sup>d</sup>  | 7,52 $\pm$ 0,16 <sup>cd</sup>  |
| C) Phytosterols         |                                |                              |                              |                               |                               |                               |                               |                               |                                |
| $\beta$ -sitosterol     | 113,2 $\pm$ 7,14 <sup>f</sup>  | 21,9 $\pm$ 0,61 <sup>h</sup> | 29,7 $\pm$ 0,89 <sup>h</sup> | 410,2 $\pm$ 10,9 <sup>b</sup> | 79,5 $\pm$ 4,59 <sup>g</sup>  | 151,9 $\pm$ 2,45 <sup>e</sup> | 282,7 $\pm$ 1,32 <sup>d</sup> | 171,1 $\pm$ 16,5 <sup>c</sup> | 487,6 $\pm$ 15,3 <sup>a</sup>  |
| Stigmasterol            | 227,3 $\pm$ 10,5 <sup>f</sup>  | 50,9 $\pm$ 1,04 <sup>d</sup> | 60,5 $\pm$ 1,38 <sup>e</sup> | 344,1 $\pm$ 8,75 <sup>e</sup> | 49,6 $\pm$ 1,76 <sup>b</sup>  | 68,9 $\pm$ 0,19 <sup>a</sup>  | 400,8 $\pm$ 1,71 <sup>d</sup> | 164,5 $\pm$ 4,68 <sup>c</sup> | 535,6 $\pm$ 10,6 <sup>ab</sup> |
| Stigmastadienol         | 18,2 $\pm$ 0,26 <sup>d</sup>   | 2,10 $\pm$ 0,13 <sup>h</sup> | 6,47 $\pm$ 0,21 <sup>f</sup> | 27,8 $\pm$ 0,68 <sup>c</sup>  | 5,62 $\pm$ 0,11 <sup>g</sup>  | 7,31 $\pm$ 10,18 <sup>e</sup> | 34,2 $\pm$ 0,16 <sup>b</sup>  | 7,03 $\pm$ 0,13 <sup>ef</sup> | 44,9 $\pm$ 0,21 <sup>a</sup>   |
| Total                   | 358,7 $\pm$ 14,3 <sup>e</sup>  | 74,9 $\pm$ 1,63 <sup>h</sup> | 96,7 $\pm$ 2,14 <sup>h</sup> | 782,0 $\pm$ 20,2 <sup>b</sup> | 134,8 $\pm$ 6,05 <sup>g</sup> | 228,2 $\pm$ 2,39 <sup>f</sup> | 717,6 $\pm$ 2,80 <sup>c</sup> | 542,7 $\pm$ 19,9 <sup>d</sup> | 1068,0 $\pm$ 25,3 <sup>a</sup> |

Values were presented as normalized area by n-tridecane (internal non-polar standard). CTRL: Control fruits. Different superscript letters (a-h) indicate statistical significance ( $P < 0.05$ ) at the same line (mean  $\pm$  standard deviation,  $n = 4$ ).
